# Supplementary material
Source: PubMed Central journal article supplement (PMC419550)

# A Embryos

Hours after heat treatment

2

4

2

4

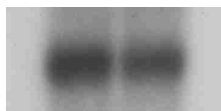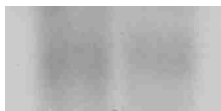

*hid*

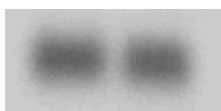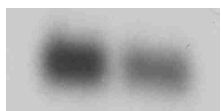

*rp49*

**control**

*hid* RNAi

## B

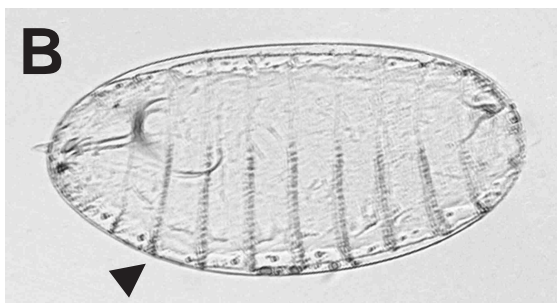

*W*<sup>1118</sup>

## C

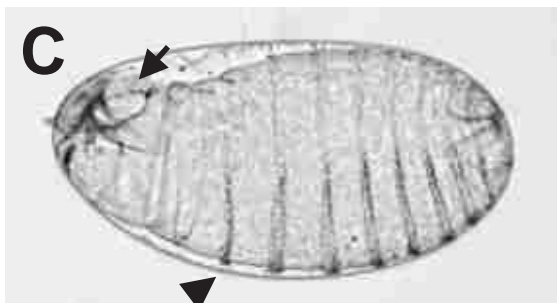

*hid* RNAi

## D

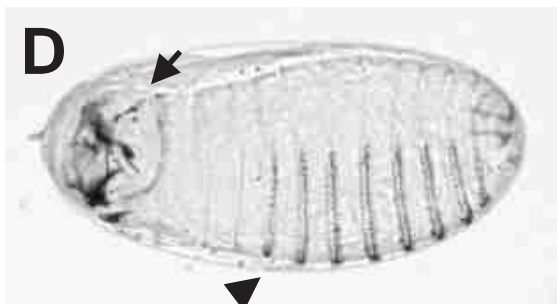

*W*<sup>rvX1/</sup>

Supplement: pnas_101_21_8022__2.pdf [file pnas_101_21_8022__2.pdf]
